# Supplementary material for: TEA incorporated CS blend composite membrane for high CO2 separation performance
Source: Royal Society of Chemistry journal article supplement (doi:10.1039/c5ra25029c), 2016-01-01
Supplement: c5ra25029c1.pdf [file c5ra25029c1.pdf]

# **TEA incorporated CS blend composite membrane for high CO<sub>2</sub> separation performance**

Miao Yu, Yan Dai, Kai Yang, Hao Li, Huimin Guo, Gaohong He\*

*State Key Laboratory of Fine Chemicals, Research and Development Center of Membrane Science of Technology,  
School of Chemical Engineering, Dalian University of Technology, Dalian, 116024, China; E-mail:  
[hgaohong@dlut.edu.cn](mailto:hgaohong@dlut.edu.cn); Fax: (+86) 0411-8498-6291.*

## **Electronic Supporting Information (ESI)**

### **Content**

|                                                               |          |
|---------------------------------------------------------------|----------|
| <b>Contact angle test</b>                                     | <b>2</b> |
| <b>Cross sectional morphologies of TEA-CS dense membranes</b> | <b>3</b> |
| <b>Stability test of TEA-CS blend composite membrane</b>      | <b>4</b> |

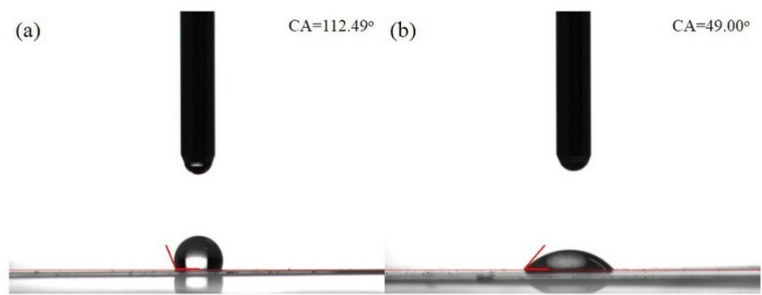

Fig. S1 Contact angle test results of (a) PP membrane (b) hydrophilized PP membrane

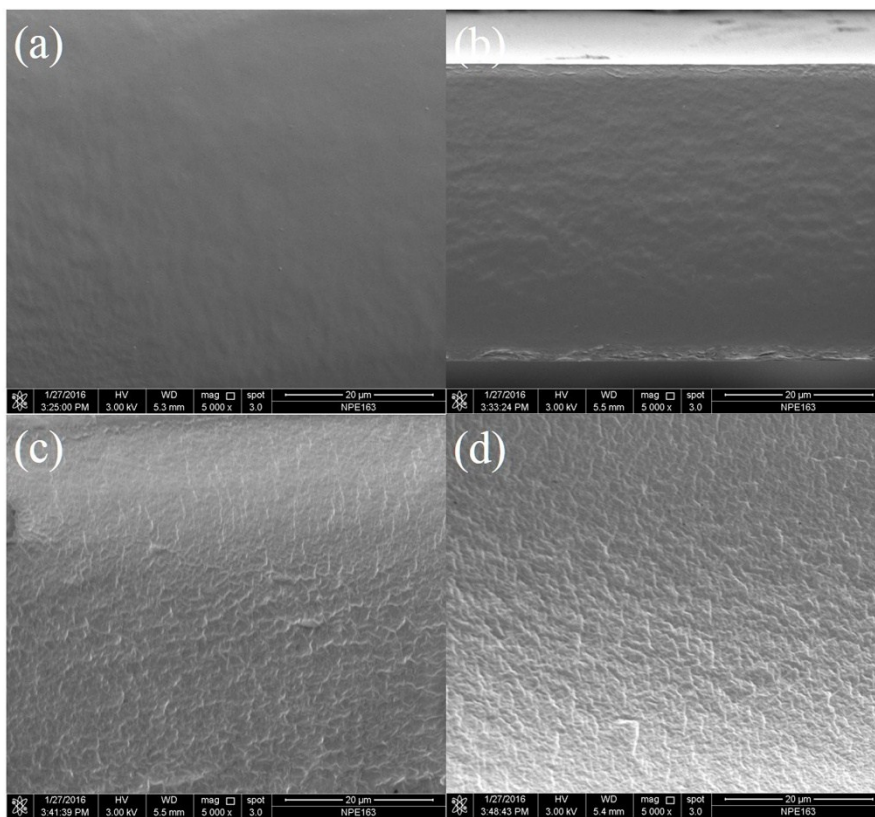

Fig.S2 SEM images of cross sectional morphologies of the dense CS membranes with different TEA contents  
(a) 0 wt.%, (b) 10 wt.%, (c) 20 wt.%, (d) 30 wt.%.

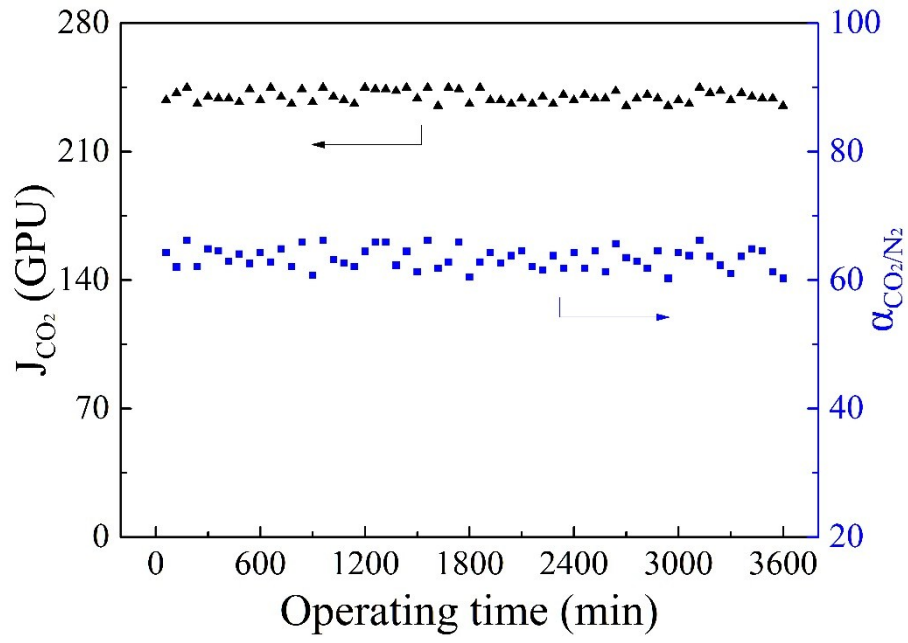

Fig. S3. Long-term performance of the TEA-CS blend composite membrane with TEA content of 15 wt.% at 0.3MPa
